# Supplementary material for: Trisodium citrate as a modulation additive to increase the cycling capability of a Bi2S3 cathode in a zinc-ion battery
Source: Royal Society of Chemistry journal article supplement (doi:10.1039/d2dt04119g), 2023-01-01
Supplement: d2dt04119g1.pdf [file d2dt04119g1.pdf]

## **Supporting Information for**

# **Trisodium Citrate as Modulation Additive to Increase the Cycle Capability of Bi<sub>2</sub>S<sub>3</sub> Cathode in Zinc-Ion Battery**

Lei Gou\*, Lin Zhu, Wen-Yan Wang, Kai Liang, Xiao-Yong Fan\*, Dong-Lin Li

*(Institute of Energy Materials and Device, School of Materials Science and  
Engineering, Chang'an University, Xi'an 710061, China)*

## Supplementary Figures

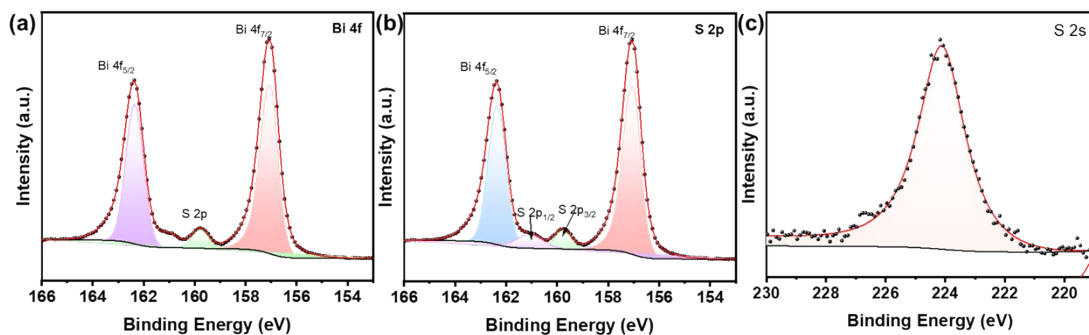

Figure S1. (a-c) Bi 4f, S 2p and S 2s spectrum of XPS for  $\text{Bi}_2\text{S}_3-0.0$ .

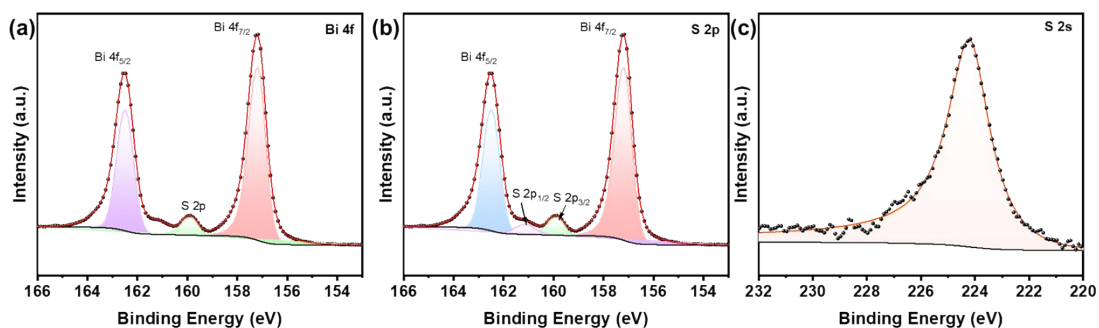

Figure S2. (a-c) Bi 4f, S 2p and S 2s spectrum of XPS for  $\text{Bi}_2\text{S}_3-0.3$ .

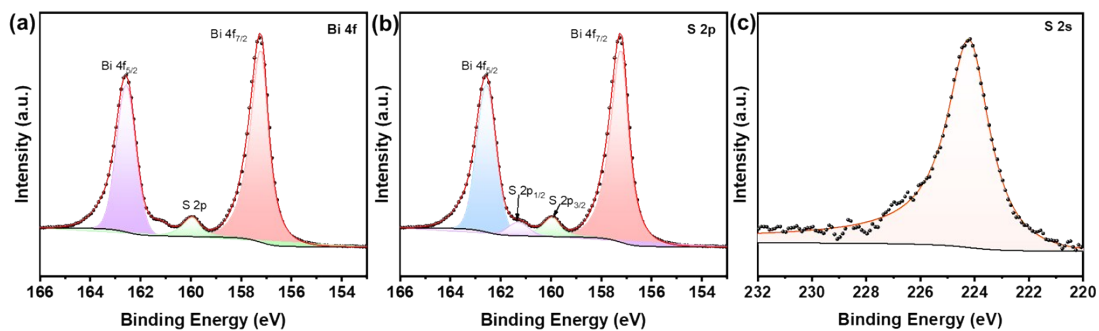

Figure S3. (a-c) Bi 4f, S 2p and S 2s spectrum of XPS for  $\text{Bi}_2\text{S}_3-0.6$ .

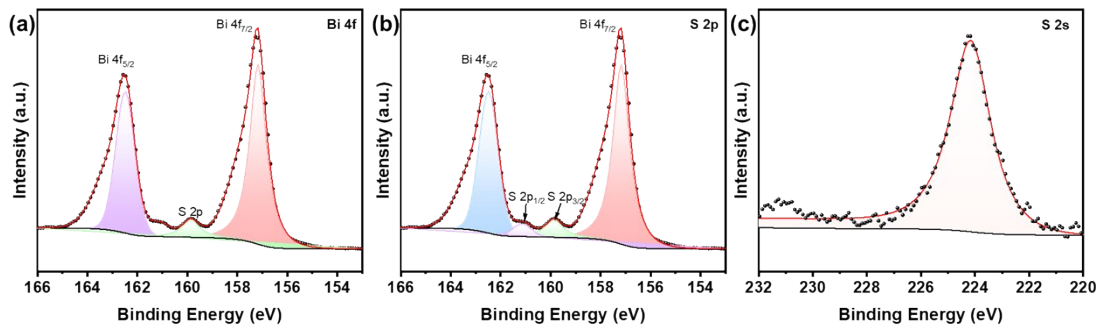

Figure S4. (a-c) Bi 4f, S 2p and S 2s spectrum of XPS for  $\text{Bi}_2\text{S}_3-0.9$ .
